# Supplementary material
Source: Elsevier journal article supplement (https://www.sciencedirect.com/science/article/pii/S1888400817300557)
Supplement: mmc1 [file S1888400817300557:mmc1.doc]

**MATERIAL SUPLEMENTARIO 1. Preparación de materiales de calibración, materiales de control, cálculo de la incertidumbre de medida y trazabilidad metrológica de los resultados de medida**

*EJEMPLO: Se ha desarrollado un procedimiento cromatográfico para la medición de la concentración de masa de ciclosporina A (CsA) en sangre basado en la HPLC-MS/MS.*

**Preparación de materiales de calibración**

*Se preparan 6 materiales de calibración en una matriz sanguínea de concentraciones de masa de CsA de 20,0, 50,0, 150, 350, 700 y 1000 µg/L, utilizando los siguientes materiales e instrumentos de medida:*

- *Un vial de 1 mL de un material de referencia certificado (Cerilliant; ref: C-093) que contiene CsA a una concentración de 1,000 g/L (en acetonitrilo). En el certificado del material se declara que la incertidumbre expandida (U), con un factor de cobertura k = 2, es 0,005 g/L.*
- *Un matraz aforado de 100 mL. El fabricante declara que el volumen que mide el matraz es de (100 ± 0,08) mL a 20 ºC.*
- *Una pipeta automática de volumen regulable 100-1000 µL calibrada, cuyo certificado de calibración indica que las incertidumbres expandidas (U), con un factor de cobertura k = 2, son 0,05 µL (a un volumen de 100 µL), 0,06 µL (a un volumen de 500 µL) y 0,08 µL (a un volumen de 1000 µL).*
- *Una pipeta automática de volumen regulable 10-100 µL calibrada, cuyo certificado de calibración indica que las incertidumbres expandidas (U), con un factor de cobertura k = 2, son 0,01 µL (a un volumen de 10 µL), 0,02 µL (a un volumen de 50 µL) y 0,03 µL (a un volumen de 100 µL).*

1. Se prepara el material de blanco a partir de una mezcla de muestras de 50 pacientes presuntamente sanos que no han ingerido ni se les ha suministrado ciclosporina A. Se realizan alícuotas de 1 mL en tubos tipo Eppendorf de 1,5 mL y se almacenan a -80 ºC.
2. Se prepara, en una matraz aforado de 100 mL, una solución primaria acuosa de ciclosporina A (CsA) a una concentración de 2000 µg/L:

Se pipetean, con la pipeta automática de *100-1000 µL*, 200 µL de la solución del material de referencia de CsA, en el matraz aforado de 100 mL y, éste se enrasa con agua de calidad HPLC-MS. Se realizan diferentes alícuotas de 1 mL de la solución primaria en tubos tipo Eppendorf de 1,5 mL y se almacenan a -80 ºC.

NOTA: Se realiza esta solución primaria (previa a la preparación de las soluciones de trabajo) para evitar la posible precipitación que provocaría preparar las soluciones de trabajo directamente a partir del material de referencia certificado (contiene acetonitrilo como disolvente), y para evitar los posibles errores atribuibles a la utilización de volúmenes reducidos que deberían emplearse para preparar las distintas soluciones de trabajo.

1. A partir de la solución primaria, se preparan seis soluciones de trabajo (1 mL) en el material de blanco (calibradores) a una concentración de 20, 50, 150, 350, 700 y 1000 µg/L.

Para cada solución de trabajo, el volumen necesario de la solución primaria se calcula mediante la siguiente fórmula:

donde *V* es el volumen de la solución primaria (en µL) que ha de añadirse para preparar la solución de trabajo y *[CsA]*, la concentración de CsA de la solución primaria (en µg/L). Los volumenes a añadir en función de la concentración de CsA de la solución de trabajo a preparar serían:

| ***V* (µL)** | ***[CsA]* de la solución de trabajo (µg/L)** |
| --- | --- |
| 10 | 20 |
| 25 | 50 |
| 75 | 150 |
| 175 | 350 |
| 350 | 700 |
| 500 | 1000 |

Cálculo de la incertidumbre de medida asociada a la preparación de la solución primaria de CsA

- Contribuciones a la incertidumbre:
- La asociada al material de referencia certificado (MRC).

*U*MRC (k=2) = 0,005 g/L; *u*MRC (g/L) = 0,005/2 = 2,5·10-3 g/L; ***u*MRC (%) =** (2,5·10-3/1,0)·100 **= 0,250 %**

- La asociada a la incertidumbre de medida del matraz aforado.

El fabricante del matraz aforado declara que el volumen que mide el matraz es 100 ± 0,08 mL, sin indicar el nivel de confianza. Dado que en este tipo de instrumentos volumétricos es más probable que el valor verdadero esté más cerca del valor nominal que en los extremos, para calcular la incertidumbre estándar (de tipo B) asumiremos que las lecturas siguen una distribución triangular de amplitud igual 0,08 mL, por lo que:

- La asociada al pipeteo de la solución del material de referencia.

El certificado de calibración de la pipeta de repetición de 100-1000µL presenta una *U*pipeta (k=2) = 0,05 µL(a un volumen de 100 µL). Suponiendo que la *U*pipeta sea la misma para un volumen de pipeteo de 200 µL:

*U*pipeta (k=2) = 0,05 µL; *u*pipeteo (µL) = 0,05/2 = 0,025 µL; ***u*MRC (%) =** (0,025/200)·100 **= 0,0125 %**

- Cálculo de la incertidumbres de medida combinada (*u*c) y expandida (con un intervalo de confianza del 95 %)

La incertidumbre combinada se calcularía como:

Si aplicamos esta *u*c relativa al valor de la solución primaria de CsA preparada (2000 µg/L), se obtiene que la ***u*c** (en µg/L) es **5,05 µg/L**.

La incertidumbre expandida ***U*** (en µg/L) con un intervalo de confianza del 95 % (k=2), se calcularía como:

***U* =** 2·*u*c **= 10,1 µg/L**

Por consiguiente, el resultado de la preparación de la solución primaria de CsA, y redondeando la *U* al mismo dígito significativo que el valor de la solución, sería:

**2000 ± 10 µg/L**

Cálculo de la incertidumbre de medida asociada a la preparación de las soluciones de trabajo (calibradores)

- Contribuciones a la incertidumbre:
- La asociada a la preparación de la solución primaria de CsA.

***u*sol.1ª (%) = 0,252 %**

- La asociada a los pipeteos de las soluciones de trabajo.

Los diferentes volúmenes de pipeteo y las correspondientes incertidumbres (en µL y en %) asociados a la preparación de distintos los materiales de calibración son:

| ***Valor del***  ***calibrador* (µg/L)** | ***Volumenpipeteo 1 (µL)*** | ***upipeteo 1***  ***(µL)*** | ***upipeteo 1***  ***(%)*** | ***Volumenpipeteo 2 (µL)*** | ***upipeteo 2***  ***(µL)*** | ***upipeteo 2***  ***(%)*** |
| --- | --- | --- | --- | --- | --- | --- |
| 20 | 990 | 0,08/2 = 0,04 | (0,04/990)·100 = 4,04·10-3 | 10 | 0,01/2 = 0,005 | (0,005/10)·100 = 0,05 |
| 50 | 975 | 0,08/2 = 0,04 | (0,04/975)·100 = 4,10·10-3 | 25 | 0,02/2 = 0,010 | (0,01/25)·100 = 0,04 |
| 150 | 925 | 0,08/2 = 0,04 | (0,04/925)·100 = 4,32·10-3 | 75 | 0,03/2 = 0,015 | (0,015/75)·100 = 0,02 |
| 350 | 825 | 0,08/2 = 0,04 | (0,04/825)·100 = 4,85·10-3 | 175 | 0,05/2 = 0,025 | 0,025/175)·100 = 0,014 |
| 700 | 650 | 0,06/2 = 0,03 | (0,03/650)·100 = 4,62·10-3 | 350 | 0,06/2 = 0,03 | (0,03/350)·100 = 0,005 |
| 1000 | 500 | 0,06/2 = 0,03 | (0,03/500)·100 = 0,06 | 500 | 0,06/2 = 0,03 | (0,03/500)·100 = 0,06 |

NOTA: Para el cálculo de las *u*pipeteo, se ha supuesto que:

- *U*pipeta (100-1000 µL) 1000 µL = *U*pipeta (100-1000 µL) 990 µL = *U*pipeta (100-1000 µL) 975 µL = *U*pipeta (100-1000 µL) 925 µL = *U*pipeta (100-1000 µL) 825 µL
- *U*pipeta (100-1000 µL) 500 µL = *U*pipeta (100-1000 µL) 350 µL = *U*pipeta (100-1000 µL) 650 µL
- *U*pipeta (100-1000 µL) 100 µL = *U*pipeta (100-1000 µL) 175 µL
- *U*pipeta (10-100 µL) 50 µL = *U*pipeta (10-100 µL) 25 µL
- *U*pipeta (10-100 µL) 100 µL = *U*pipeta (10-100 µL) 75 µL
- Cálculo de la incertidumbres de medida combinada (*u*c) y expandida (con un intervalo de confianza del 95 %).

La incertidumbre combinada, para cada calibrador se calcularía como:

Las diferentes *u*c y *U* (con un intervalo de confianza del 95 %) correspondientes a cada material de calibración serían:

| **Calibrador** | **uc (%)** | **uc (µg/L)** | ***U* (µg/L)** |
| --- | --- | --- | --- |
| 20 µg/L | 0,2569 | 0,051 | 0,10 |
| 50 µg/L | 0,2552 | 0,128 | 0,26 |
| 150 µg/L | 0,2528 | 0,379 | 0,76 |
| 350 µg/L | 0,2524 | 0,884 | 1,77 |
| 700 µg/L | 0,2521 | 1,765 | 3,53 |
| 1000 µg/L | 0,2659 | 2,659 | 5,32 |

Por consiguiente, los resultados de la preparación de los calibradores, y redondeando la *U* a los mismos dígitos significativos que los valores de las soluciones, serían:

**20,0 ± 0,1 µg/L**

**50,0 ± 0,3 µg/L**

**150 ± 1 µg/L**

**350 ± 2 µg/L**

**700 ± 4 µg/L**

**1000 ± 5 µg/L**

Cadena de trazabilidad

La cadena de trazabilidad de los resultados asociados a la preparación de los materiales de calibración sería:

**Preparación de materiales de control**

*Se preparan 3 materiales de control en una matriz sanguínea de concentraciones de masa de CsA de 40,0, 200 i 800 µg/L. Para la preparación de los materiales de control y el cálculo de la incertidumbre de medida se emplearán los mismos materiales e instrumentos de medida, así como el mismo procedimiento descrito para los materiales de calibración:*

1. Se prepara el material de blanco a partir de una mezcla de muestras de 50 pacientes presuntamente sanos que no han ingerido ni se les ha suministrado ciclosporina A. Se realizan alícuotas de 1 mL en tubos tipo Eppendorf de 1,5 mL y se almacenan a -80 ºC.

NOTA: Puede emplearse el mismo material de blanco que el utilizado para los materiales de calibración, siempre que el volumen preparado del mismo sea suficiente.

1. Se prepara, en una matraz aforado de 100 mL, una solución primaria acuosa de ciclosporina A (CsA) a una concentración de 2000 µg/L:

Se pipetean, con la pipeta automática de *100-1000 µL*, 200 µL de la solución del material de referencia de CsA, en el matraz aforado de 100 mL y, éste se enrasa con agua de calidad HPLC-MS. Se realizan diferentes alícuotas de 1 mL de la solución primaria en tubos tipo Eppendorf de 1,5 mL y se almacenan a -80 ºC.

NOTAS:

- Se realiza esta solución primaria (previa a la preparación de las soluciones de trabajo) para evitar la posible precipitación que provocaría preparar las soluciones de trabajo directamente a partir del material de referencia certificado (contiene acetonitrilo como disolvente), y para evitar los posibles errores atribuibles a la utilización de volúmenes reducidos que deberían emplearse para preparar las distintas soluciones de trabajo.
- Debe utilizarse de una solución primaria diferente a la utilizada para los materiales de calibración.

1. A partir de la solución primaria, se preparan tres soluciones de trabajo (1 mL) en el material de blanco (controles) a una concentración de 40,0, 200 y 800 µg/L.

Los volúmenes a añadir en función de la concentración de CsA de la solución de trabajo a preparar serían:

| ***V* (µL)** | ***[CsA]* de la solución de trabajo (µg/L)** |
| --- | --- |
| 20 | 40 |
| 100 | 200 |
| 400 | 800 |

Cálculo de la incertidumbre de medida asociada a la preparación de las soluciones de trabajo (controles)

Las diferentes *u*c y *U* (con un intervalo de confianza del 95 %) correspondientes a cada material de control serían:

| **Control** | **uc (%)** | **uc (µg/L)** | ***U* (µg/L)** |
| --- | --- | --- | --- |
| 40 µg/L | 0,2569 | 0,103 | 0,21 |
| 200 µg/L | 0,2522 | 0,504 | 1,01 |
| 800 µg/L | 0,2522 | 2,018 | 4,03 |

Por consiguiente, los resultados de la preparación de los controles, y redondeando la *U* a los mismos dígitos significativos que los valores de las soluciones, serían:

**40,0 ± 0,2 µg/L**

**200 ± 1 µg/L**

**800 ± 4 µg/L**
