# Supplementary material
Source: Elsevier journal article supplement (https://www.sciencedirect.com/science/article/pii/S1888400817300557)
Supplement: mmc2 [file S1888400817300557:mmc2.doc]

**MATERIAL SUPLEMENTARIO 2. Ejemplo de selección de un patrón interno y cómo llevar a cabo la preparación de la solución de trabajo del patrón interno**

*Se ha desarrollado un procedimiento cromatográfico para la medición de la concentración de masa de ciclosporina A (CsA) en la sangre basado en la HPLC-MS/MS.*

**Selección del patrón interno**

La ciclosporina A es un undecapéptido cíclico que presenta la siguiente estructura química:


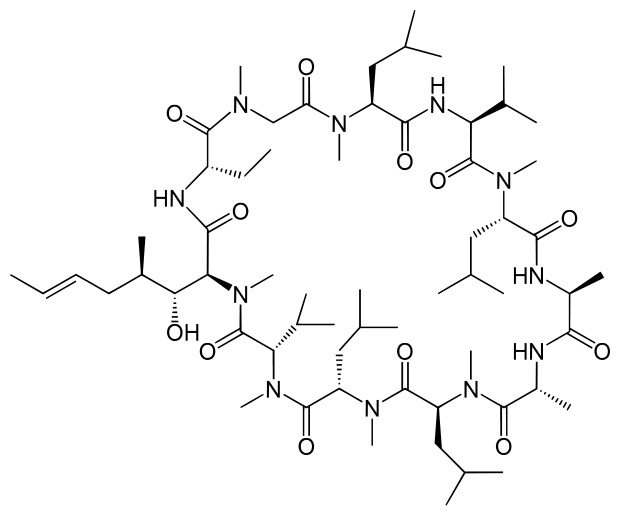


Como patrón interno (IS), podrían emplearse análogos estructurales de este fármaco (p.ej.: ciclosporina B, C, D, H o acetato de ciclosporina A), siempre y cuando cumplan los requisitos que se citan en el apartado 3.7.3. Pese a ello, al emplear un espectrómetro de masas de triple cuadrupolo como sistema de detección cromatográfico, el mejor patrón interno que podría emplearse sería el propio fármaco marcado isotópicamente, como por ejemplo, la ciclosporina A con 12 deuterios ([D12]-ciclosporina A) o la ciclosporina A con 11 nitrógenos-15 ([15N11]-ciclosporina A), entre otros.

**Preparación de la solución de trabajo del patrón interno**

*El intervalo terapéutico de la concentración de ciclosporina A en la sangre está comprendido entre 100 y 300 µg/L. Por consiguiente, la solución de trabajo del patrón interno se preparará a una concentración que esté comprendida dentro de este intervalo (150 µg/L).*

*Se dispone del siguiente material:*

- *Un vial de 1 mL de un material de referencia certificado (Cerilliant; ref: C-139) que contiene [15N11]-Ciclosporina A a una concentración de 100 mg/L (en acetonitrilo).*
- *Un matraz aforado de 50 mL.*
- *Una pipeta automática de volumen regulable 10-100 µL.*

1. Se prepara, en una matraz aforado de 100 mL, una solución de trabajo acuosa de [*15N11*]*-Ciclosporina A* a una concentración de 150 µg/L:

Se pipetean, con la pipeta automática de 10-100 µL, 15 µL del material de referencia que contiene [15N11]-Ciclosporina A en el matraz aforado de 100 mL y, éste se enrasa con agua de calidad HPLC-MS.

1. Se realizan diferentes alícuotas (p.ej.: de 1 mL) de la solución de trabajo prepara en tubos tipo Eppendorf de 1,5 mL y se almacenan a -80 ºC.
